# Supplementary material
Source: Springer Nature journal article supplement (https://www.springermedizin.de/resource/supplementary/12968_2013_3943_MOESM2_ESM.pdf/9584932)

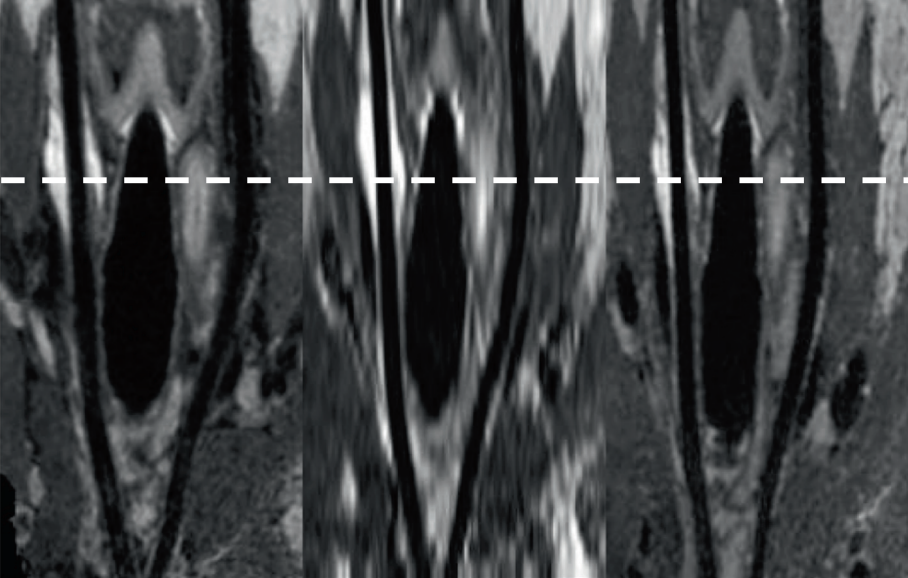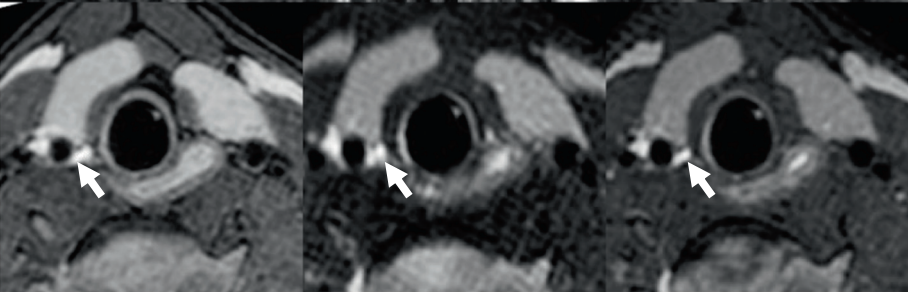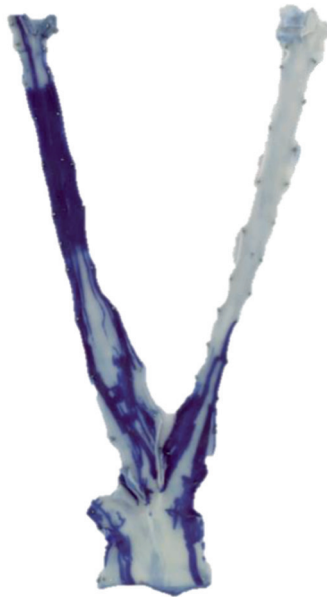

Supplement: MOESM2 [file 9584932]
